# Supplementary material
Source: publisher site journal article supplement (https://www.dovepress.com/get_supplementary_file.php?f=456132.docx)
Supplement: Supplementary file 1 [file get_supplementary_file.php]

**Supplementary Material**

**Supplementary Table 1.** The list of primer sequences used for the q-PCR.

| **Gene** | **Forward primer (5' to 3')** | **Reverse primer (5' to 3')** |
| --- | --- | --- |
| TGFBI | ATGACCCTCACCTCTATGTACC | CACAGTTCACAGTTACAATCCCA |
| CD86 | CCCGGATGGTGTGTGGCATA | TCACAAGGAGGAGGGCCACA |
| iNOS | TTCAGTATCACAACCTCAGCAAG | TGGACCTGCAAGTTAAAATCCC |
| CD163 | CATGTCTCTGAGGCTGACCA | TGCACACGATCTACCCACAT |
| CD206 | TACCTGAGCCCACACCTGCT | GCGCGTTGTCCATGGTTTCC |
| GAPDH | AAGGTGAAGGTCGGAGTCAAC | GGGGTCATTGATGGCAACAATA |

**Supplementary Table 2.** The basic information of datasets in the study.

| **Series accession numbers** | **Platform used** | **No. of control samples** | **No. of disease samples** | **Endotype class  (%)** | **Gender**  **(%)** | **Age  ()** | **Vital status  (%)** | **Survive time  ()** |
| --- | --- | --- | --- | --- | --- | --- | --- | --- |
| GSE13904 | Affymetrix Human Genome U133 Plus 2.0 Array (GPL570) | 18 | 158  (Sepsis: 52 [32.9]); Septic shock: 106 [67.1]) | NA | NA | NA | NA | NA |
| GSE66099 | Affymetrix Human Genome U133 Plus 2.0 Array (GPL570) | 47 | 199  (Sepsis: 18 [9.0]); Septic shock: 181 [91.0]) | NA | NA | NA | NA | NA |
| GSE65682 | Affymetrix Human Genome U219 Array (GPL13667) | 42 | Sepsis: 479 | Mars1: 132 (27.6); Mars2: 172 (35.9); Mars3: 118 (24.6); Mars4: 53 (11.1); | Female: 225 (47.8);  Male: 296 (52.2) | 59.8 ± 12.6 | Alive: 365 (76.2);  Dead:114 (23.8) | 23.2 ± 9.2 |
| GSE26378 | Affymetrix Human Genome U133 Plus 2.0 Array (GPL570) | 21 | Septic shock: 82 | NA | NA | 3.7 ± 3.2 | Alive: 70 (85.4);  Dead: 12 (14.6) | NA |
| GSE134347 | Affymetrix Human Transcriptome Array 2.0 [transcript (gene) version] (GPL17586) | 83 | Sepsis: 156 | NA | NA | NA | NA | NA |

Abbreviations. NA: Not available.


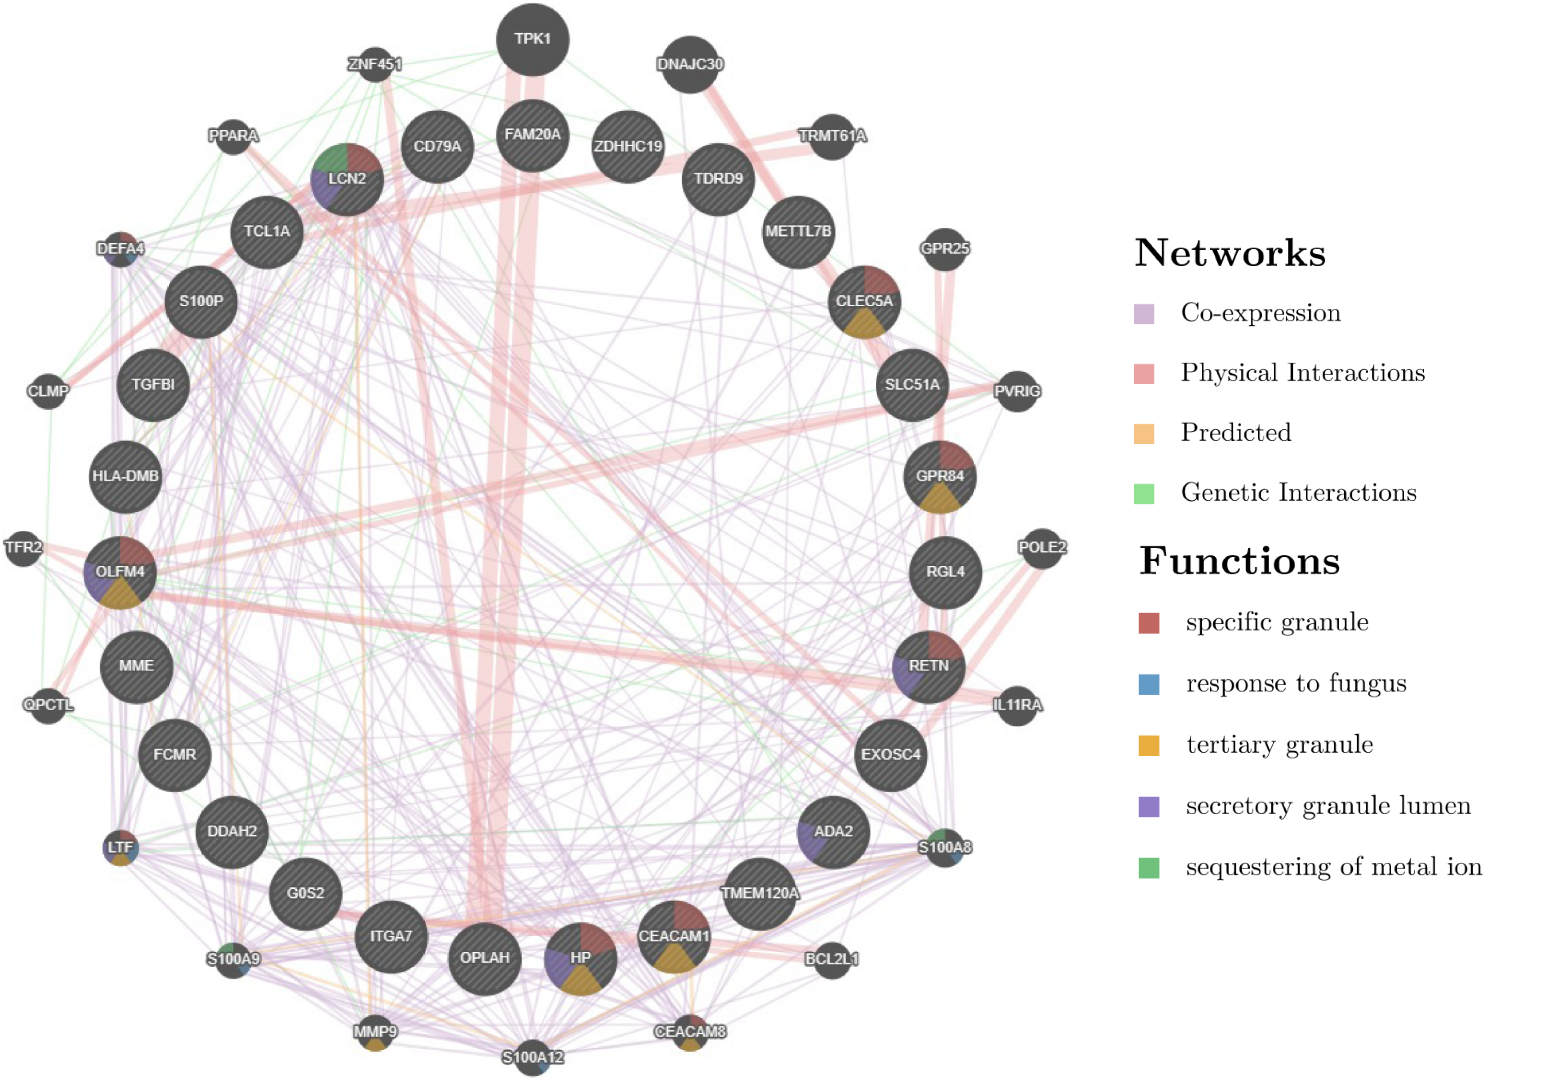


**Supplementary Figure 1.** Proteins with similar functions to 28 candidate targets were identified by GeneMANIA (<https://genemania.org/>). Finally, another 25 genes (ADA2, FCMR, TPK1, DNAJC30, TRMT61A, GPR25, PVRIG, POLE2, IL11RA, S100A8, BCL2L1, CEACAM8, S100A12, MMP9, S100A9, LTF, QPCTL, TFR2, CLMP, DEFA4, PPARA and ZNF451) with comparable roles were discovered.


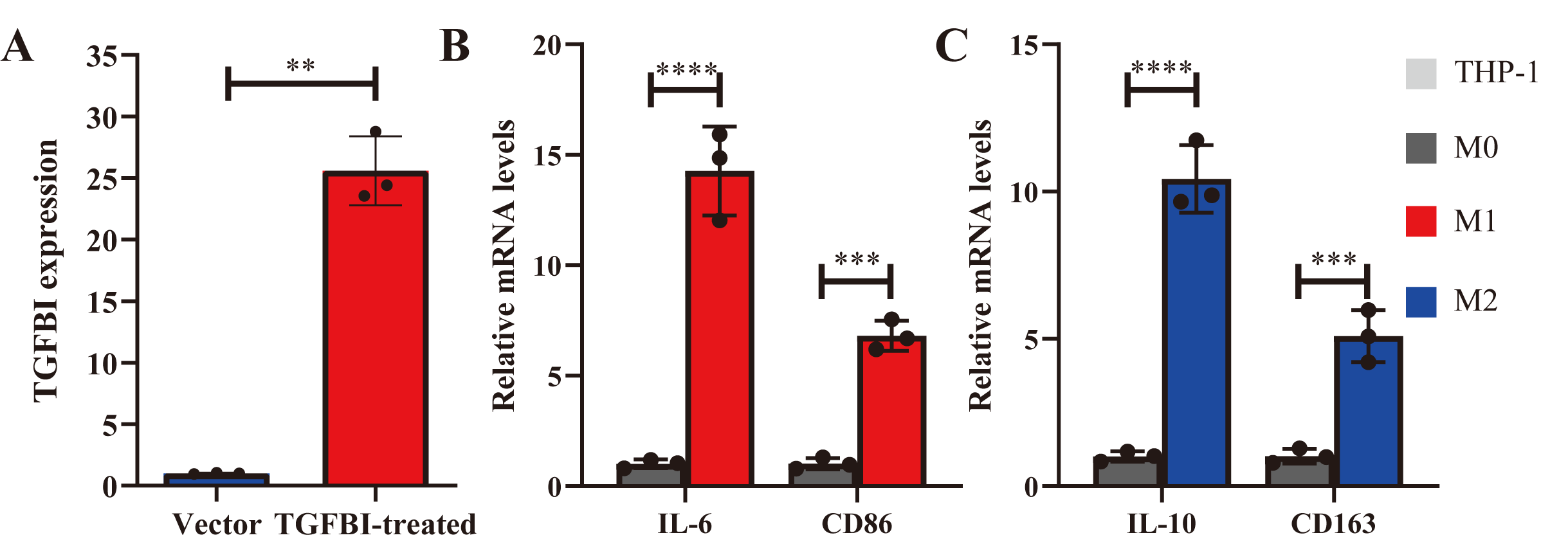


**Supplementary Figure 2.** Expression levels of TGFBI overexpression (A), monocytes upon differentiation into M1 (iNOS and CD86, B), and M2 (CD206 and CD163, C) macrophages were detected by q-PCR. **P<0.01, ***P<0.001, ****P<0.0001.
